# Supplementary material for: The evolution of convex trade-offs enables the transition towards multicellularity
Source: PubMed Central journal article supplement (PMC8270964; doi:10.1038/s41467-021-24503-z), 2021-07-09
Supplement: 41467_2021_24503_MOESM1_ESM.pdf [file 41467_2021_24503_MOESM1_ESM.pdf]

Supplementary information

## The evolution of convex trade-offs enables the transition towards multicellularity

*Joana P. Bernardes, Uwe John, Noemi Woltermann, Martha Valiadi, Ruben J. Hermann, Lutz Becks*

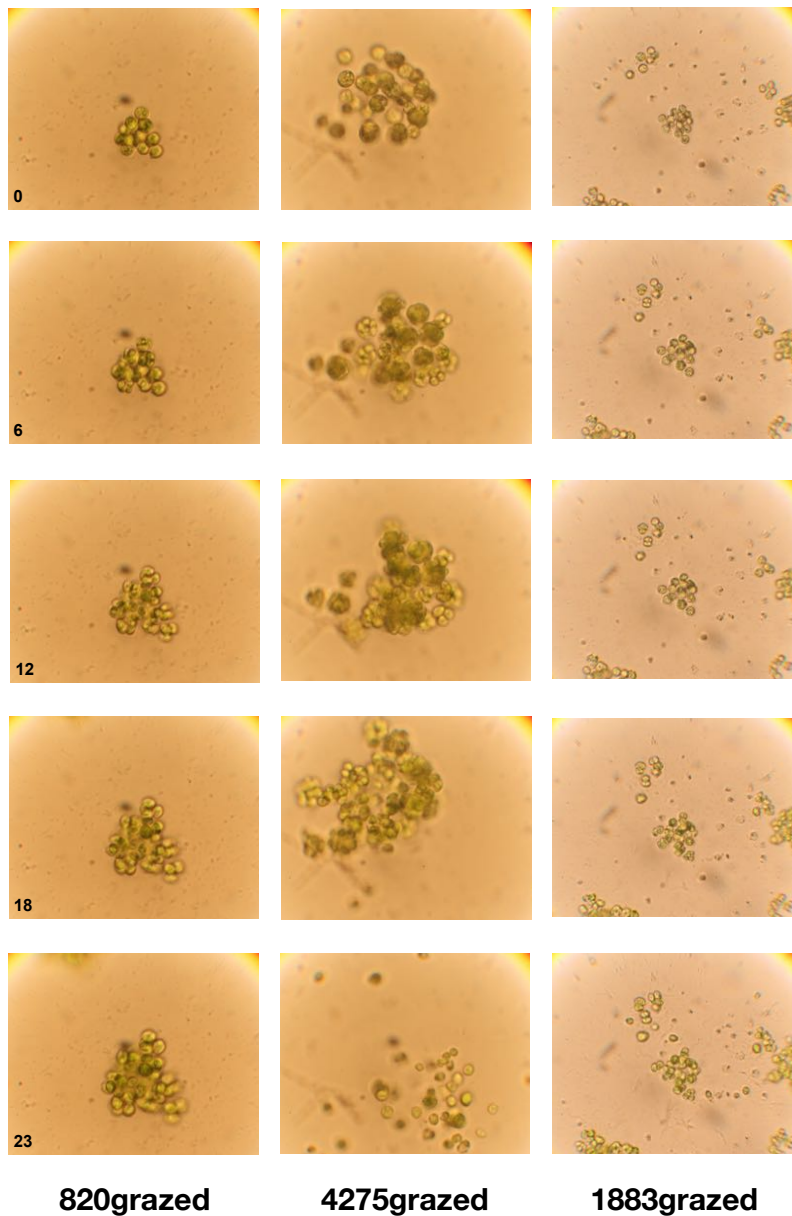

**Figure S1: Representative microscopic images of growth of cell groups over 23hrs.** Left: isolate from selection line started with cc-850, middle: cc-4275, right: cc-1883. Algal cells were added to a growth chamber of an 8-well chambered cover glass filled with COOL160 medium. Images were taken with an inverse microscope (magnification 200x) and a Nikon camera attached to it. Images were taken every 5 minutes for 24 hours.

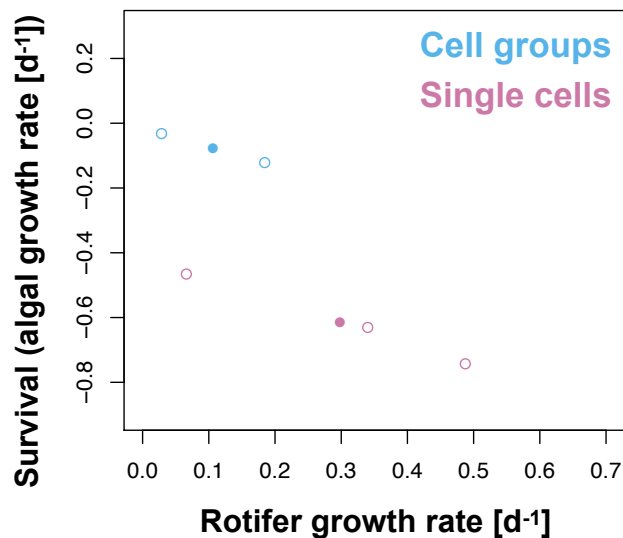

**Figure S2:** Correlation between algal survival and defense measured as algal and rotifer growth rate in chemostats for two different algal isolates either growing in cell groups or single cells. Chemostats were inoculated with isogenic lines of single cells or cell groups. Algal populations grew to steady state before rotifers were added. Algal and rotifer growth rates were estimated as the average growth rate from day when rotifers had positive growth rates till the day of the rotifer maximum population size. Open symbols replicates (cell groups: 2; single cells: 3), filled symbols represent the average. Source data are provided as a Source Data file.

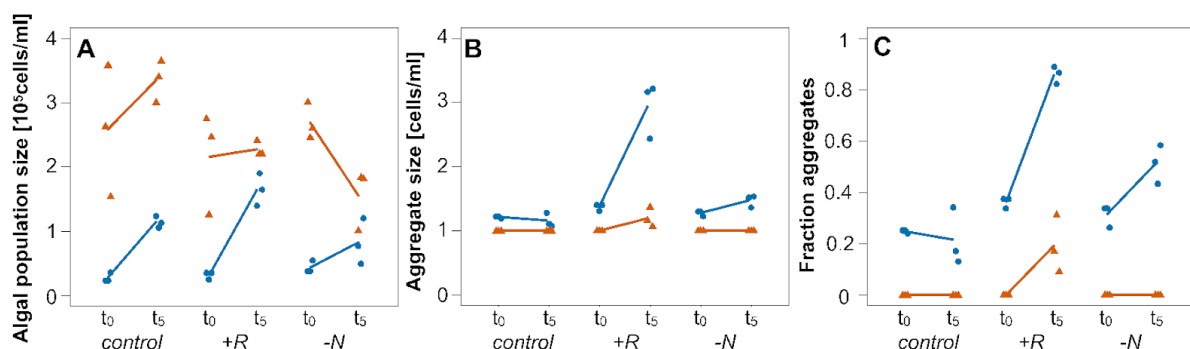

**Figure S3: Phenotypic response of isolated algal clones that have previous been selected by competition (red) or predation (blue) to the presence of rotifers (+R) and reduced nitrogen (-N).** A) Differences in the cell densities before the addition of a stressor ( $T_0$ ) and 5 days later  $T_5$ ). B) Difference in aggregate size and C) fraction of aggregates in the algal population. Shown are replicates (points) and the mean of three replicates (line). Source data are provided as a Source Data file.

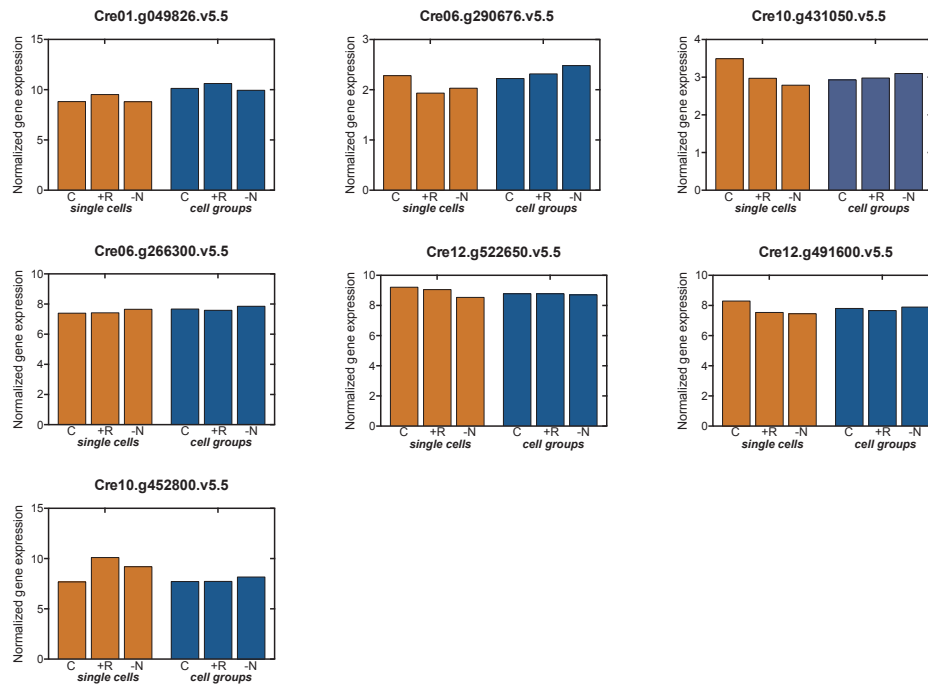

**Figure S4: Expression profiles of the five shared variants with amino acid changes.** Normalized expression extracted from the transcription profiles of the algal. *Single cells* selection regiment expression depicted in orange and *cell groups* in blue bars, the individual bars represent the treatments the clones were exposed to.

**Table S1:** Reference strain mutations. List of *Chlamydomonas reinhardtii* strains used to set up the selection experiment, specific mutations and mating type, and phenotype described in previous studies. All strains were purchased from the Chlamydomonas strain collection at Chlamydomonas Resource Center. Mutation refers to the culture collections description.

| <b>Strain</b> | <b>Mutation</b>                        | <b>Phenotype</b>                                      |
|---------------|----------------------------------------|-------------------------------------------------------|
| cc850         | <i>cw18 mt-</i>                        | <i>Wall deficient for cell clusters</i>               |
| cc1009        | <i>mt-</i>                             | <i>Wild type</i>                                      |
| cc1144        | <i>sr1 msr1 nr1 act2 pyr1 NIT+ mt-</i> | <i>Antibiotic resistance and metabolic inhibitors</i> |
| cc1883        | <i>cw15 NIT+ mt-</i>                   | <i>Wall deficient mutant</i>                          |
| cc2531        | <i>vf12 mt-</i>                        | <i>Variable number of flagella</i>                    |
| cc2698        | <i>cia2</i>                            | <i>Altered CO<sub>2</sub> assimilation</i>            |
| cc2854        | <i>pf18 cw92 mt-</i>                   | <i>Wall deficient and motility impairment</i>         |
| cc3056        | <i>cw15 chIB (disruption) mt-</i>      | <i>Chlorophyll deficient and wall deficient</i>       |
| cc3754        | <i>fa2-4 mt-</i>                       | <i>Impaired flagellar autonomy</i>                    |
| cc4275        | <i>ars11 (snrk2.1) mt-</i>             | <i>Impaired response to sulfur starvation</i>         |

**Table S2:** Assembly and variant information of sequenced *C. reinhardtii* strains

| Strain and environment | Morphology* | ID  | assembled bp | Contigs (#) | average length (bp) | N50  | Variants (#) |
|------------------------|-------------|-----|--------------|-------------|---------------------|------|--------------|
| 4275ungrazed           | <i>S1</i>   | S1  | 98983276     | 182064      | 544                 | 1587 | 101272       |
| 4275grazed             | <i>C2</i>   | S2  | 104345484    | 194143      | 537                 | 1522 | 109792       |
| 1144ungrazed           | <i>S1</i>   | S3  | 100798433    | 180803      | 558                 | 1889 | 283096       |
| 1144grazed             | <i>C2</i>   | S4  | 95910447     | 196255      | 489                 | 1274 | 129514       |
| 1009ungrazed           | <i>S1</i>   | S5  | 108241743    | 190832      | 567                 | 1738 | 230465       |
| 1009grazed             | <i>C2</i>   | S6  | 97706888     | 174816      | 559                 | 1679 | 235437       |
| 850ungrazed            | <i>S2</i>   | S7  | 96431227     | 174952      | 551                 | 1626 | 233848       |
| 850grazed              | <i>C2</i>   | S8  | 108651670    | 195158      | 556                 | 1725 | 164350       |
| 3754ungrazed           | <i>S2</i>   | S9  | 109029565    | 206358      | 528                 | 1356 | 134476       |
| 3754grazed             | <i>C1</i>   | S10 | 96017187     | 197415      | 486                 | 1143 | 97955        |
| 3056ungrazed           | <i>S2</i>   | S11 | 99075774     | 197652      | 501                 | 1283 | 126676       |
| 3056grazed             | <i>C2</i>   | S12 | 103694500    | 198328      | 523                 | 1235 | 212232       |
| 2698ungrazed           | <i>S2</i>   | S13 | 113159208    | 230200      | 492                 | 1962 | 203608       |
| 2698grazed             | <i>C2</i>   | S14 | 93766290     | 221712      | 423                 | 680  | 139844       |
| 1883ungrazed           | <i>S2</i>   | S15 | 101794564    | 204711      | 497                 | 1183 | 66673        |
| 1883grazed             | <i>C1</i>   | S16 | 108239427    | 232747      | 465                 | 967  | 179801       |
| 2854ungrazed           | <i>S2</i>   | S17 | 96155163     | 196467      | 489                 | 1173 | 31731        |
| 2854grazed             | <i>C2</i>   | S18 | 96730316     | 240605      | 402                 | 521  | 119892       |

\* *S1*: single cells with no-motile single cells. *S2*: single cells with some motile single cells present; *S3*: single cells with majority motile single cells; *C1*: cell groups with no single cells; *C2*: cell groups with non-motile single cells; *C3*: cell groups with motile single cells.
